# Supplementary material
Source: publisher site journal article supplement (https://www.dovepress.com/article/215000)
Supplement: Supplementary file 1 [file get_supplementary_file.php]

## **Supplementary Materials:**

### **Supplementary Figure and Table legend**

Figure S1: Flowchart of the subjects' selection for the TBCCC cohort (A) and the SERR cohort (B).

Table S1: Comparison of different models for evaluating breast cancer prognosis

Table S2: Difference in the demographic and clinical factors between the subjects receiving chemotherapy and without in total population.

Table S3: Difference in the demographic and clinical factors between the subjects receiving chemotherapy and without in low risk population.

Table S4: Difference in the demographic and clinical factors between the subjects receiving chemotherapy and without in mediate risk population.

Table S5: Difference in the demographic and clinical factors between the subjects receiving chemotherapy and in high risk population.

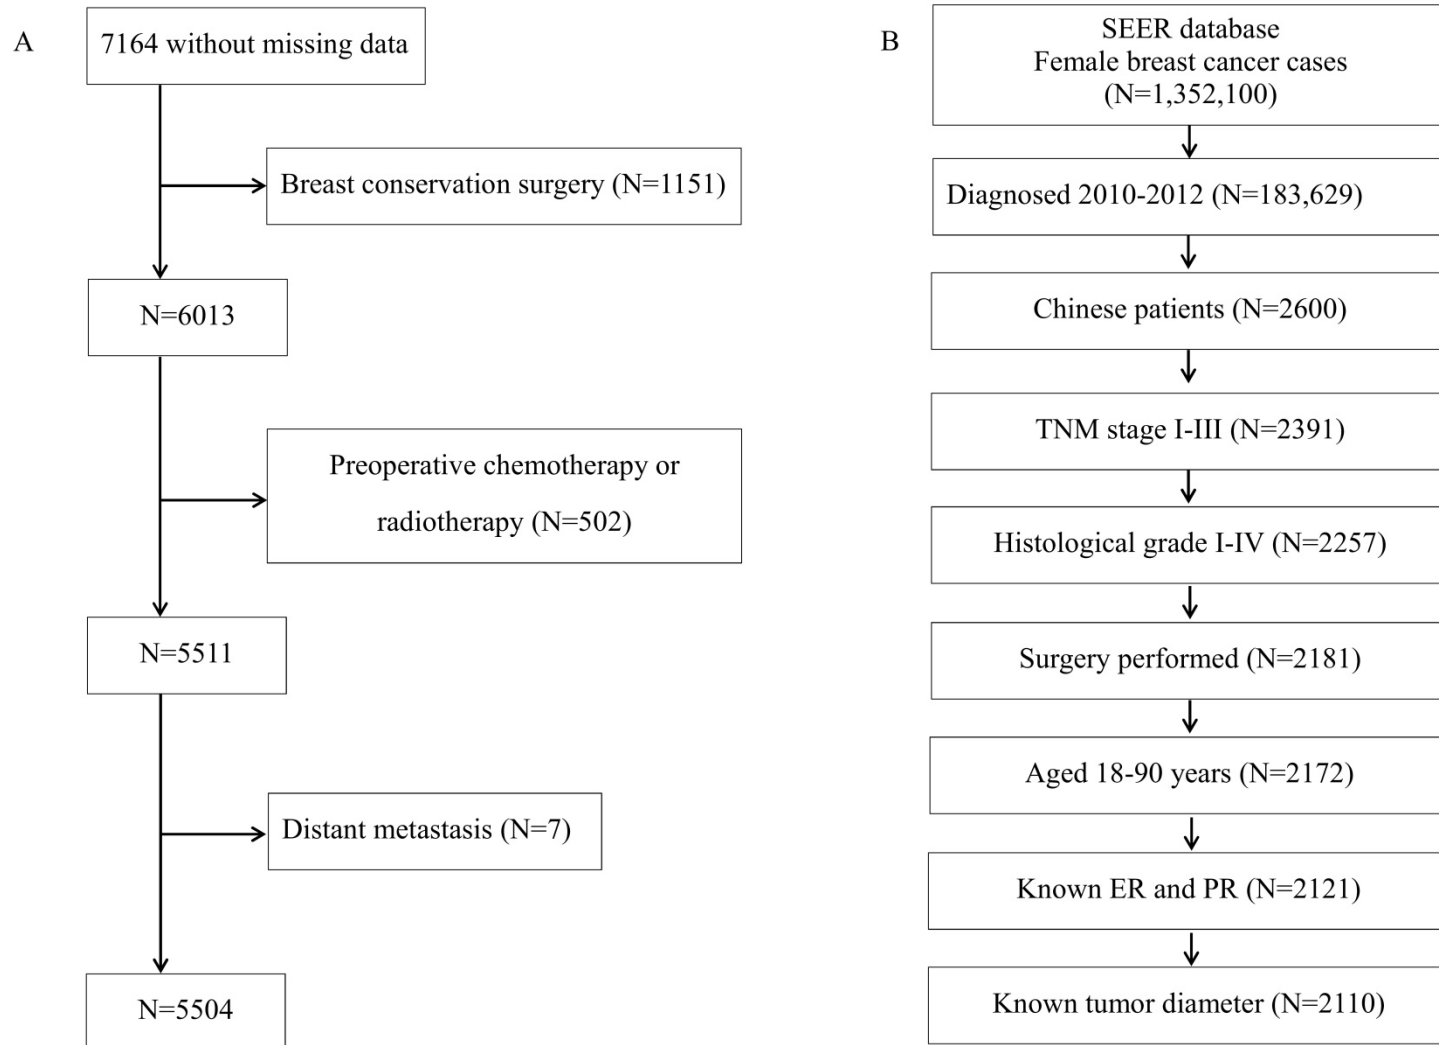

**Figure S1: Flowchart of the subjects' selection for the TBCCC cohort (A) and the SERR cohort (B).**

**Table S1: Comparison of different models for evaluating breast cancer prognosis**

| <b>Models</b>           | <b>Population</b>                                                                                   | <b>Factors</b>                                                                                                                                                        | <b>Outcomes</b>                                                  |
|-------------------------|-----------------------------------------------------------------------------------------------------|-----------------------------------------------------------------------------------------------------------------------------------------------------------------------|------------------------------------------------------------------|
| <b>PREDICT</b>          | Eastern Cancer Registration and Information Centre (ECRIC) dataset                                  | Age at diagnosis, menopausal status, ER status, HER2 status, Ki-67 status, Tumor size, Tumor grade, positive nodes number, and diagnosis type (screening or symptoms) | Breast cancer specific mortality and mortality from other causes |
| <b>MammaPrint</b>       | Primary breast cancer patients                                                                      | 70 genes associated with breast cancer recurrence                                                                                                                     | Breast cancer recurrence                                         |
| <b>OncotypeDX</b>       | NSABP trial B-14                                                                                    | 21 genes associated with breast cancer recurrence                                                                                                                     | Breast cancer distant recurrence                                 |
| <b>MSKCC nomogram</b>   | Breast cancer procedures of axillary SLN biopsy performed at Memorial Sloan-Kettering Cancer Center | Age, tumor size, tumor type, lymphovascular invasion, tumor location, multifocality, and ER status and PR status                                                      | Breast cancer with sentinel lymph node (SLN) metastasis          |
| <b>Adjuvant! Online</b> | Breast cancer patients in Surveillance, Epidemiology, and End-Results data                          | Age, menopausal status, Comorbidity, ER status, tumor size, positive nodes                                                                                            | Breast cancer specific mortality rates at the 10-year            |

**Table S2: Difference in the demographic and clinical factors between the subjects receiving chemotherapy and without in total population.**

| Factors                             | Before matching               |                           |            |                 | After PSM matching            |                           |            |                 |
|-------------------------------------|-------------------------------|---------------------------|------------|-----------------|-------------------------------|---------------------------|------------|-----------------|
|                                     | Not receiving<br>Chemotherapy | Receiving<br>Chemotherapy | $\chi^2/Z$ | <i>P</i> -value | Not receiving<br>Chemotherapy | Receiving<br>Chemotherapy | $\chi^2/Z$ | <i>P</i> -value |
| <b>Age</b>                          |                               |                           | 34.28      | <0.0001         |                               |                           | 0.20       | 0.66            |
| ≤50 years                           | 328(38.2)                     | 2278(49.0)                |            |                 | 328(38.2)                     | 337(39.2)                 |            |                 |
| >50 years                           | 531(61.8)                     | 2367(51.0)                |            |                 | 531(61.8)                     | 522(60.8)                 |            |                 |
| <b>Diameter</b>                     |                               |                           | 8.75       | 0.003           |                               |                           | 0.28       | 0.60            |
| ≤2 cm                               | 418(48.7)                     | 2007(43.2)                |            |                 | 418(48.7)                     | 429(49.9)                 |            |                 |
| >2cm                                | 441(51.3)                     | 2638(56.8)                |            |                 | 441(51.3)                     | 430(50.1)                 |            |                 |
| <b>Histological differentiation</b> |                               |                           | 1.84       | 0.066           |                               |                           | 0.31       | 0.76            |
| Well differentiated                 | 97(11.3)                      | 360(7.8)                  |            |                 | 97(11.3)                      | 75(8.7)                   |            |                 |
| Moderately differentiated           | 610(71.0)                     | 3457(74.4)                |            |                 | 610(71.0)                     | 646(75.2)                 |            |                 |
| Poor differentiated                 | 152(17.7)                     | 828(17.8)                 |            |                 | 152(17.7)                     | 138(16.1)                 |            |                 |
| <b>Lymph node metastasis</b>        |                               |                           | 50.50      | <0.0001         |                               |                           | 0.094      | 0.76            |
| N0                                  | 567(66.0)                     | 2456(52.9)                |            |                 | 567(66.0)                     | 573(66.7)                 |            |                 |
| N+                                  | 292(34.0)                     | 2189(47.1)                |            |                 | 292(34.0)                     | 286(33.3)                 |            |                 |
| <b>ER</b>                           |                               |                           | 3.31       | 0.07            |                               |                           | 1.88       | 0.17            |
| Negative                            | 243(28.3)                     | 1459(31.4)                |            |                 | 243(28.3)                     | 269(31.3)                 |            |                 |
| Positive                            | 616(71.7)                     | 3186(68.6)                |            |                 | 616(71.7)                     | 590(68.7)                 |            |                 |
| <b>PR</b>                           |                               |                           | 0.83       | 0.36            |                               |                           | 1.13       | 0.29            |
| Negative                            | 290(33.8)                     | 1643(35.4)                |            |                 | 290(33.8)                     | 311(36.2)                 |            |                 |
| Positive                            | 569(66.2)                     | 3002(64.6)                |            |                 | 569(66.2)                     | 548(63.8)                 |            |                 |
| <b>HER-2</b>                        |                               |                           | 1.64       | 0.20            |                               |                           | 0.114      | 0.74            |
| Negative                            | 654(76.1)                     | 3440(74.1)                |            |                 | 654(76.1)                     | 648(75.4)                 |            |                 |
| Positive                            | 205(23.9)                     | 1205(25.9)                |            |                 | 205(23.9)                     | 211(24.6)                 |            |                 |
| <b>Endocrine therapy</b>            |                               |                           | 24.18      | <0.0001         |                               |                           | 0.298      | 0.59            |
| No                                  | 685(79.7)                     | 3327(71.6)                |            |                 | 685(79.7)                     | 694(80.8)                 |            |                 |
| Yes                                 | 174(20.3)                     | 1318(28.4)                |            |                 | 174(20.3)                     | 165(19.2)                 |            |                 |
| <b>Radiotherapy</b>                 |                               |                           | 119.19     | <0.0001         |                               |                           | 0.023      | 0.88            |
| No                                  | 836(97.3)                     | 3851(82.9)                |            |                 | 836(97.3)                     | 837(97.4)                 |            |                 |
| Yes                                 | 23(15.6)                      | 794(17.1)                 |            |                 | 23(2.7)                       | 22(2.6)                   |            |                 |

Abbreviation: ER=estrogen receptor; PR=Progesterone receptor; HER-2=human epidermal growth factor receptor-2, PSM= propensity score matching.

**Table S3: Difference in the demographic and clinical factors between the subjects receiving chemotherapy and without in low risk population.**

| Factors                             | Before matching               |                           |            |                 | After PSM matching            |                           |            |                 |
|-------------------------------------|-------------------------------|---------------------------|------------|-----------------|-------------------------------|---------------------------|------------|-----------------|
|                                     | Not receiving<br>Chemotherapy | Receiving<br>Chemotherapy | $\chi^2/Z$ | <i>P</i> -value | Not receiving<br>Chemotherapy | Receiving<br>Chemotherapy | $\chi^2/Z$ | <i>P</i> -value |
| <b>Age</b>                          |                               |                           | 5.12       | 0.024           |                               |                           | 0.028      | 0.87            |
| ≤50 years                           | 201(64.8)                     | 1138(71.3)                |            |                 | 201(64.8)                     | 203(65.5)                 |            |                 |
| >50 years                           | 109(35.2)                     | 459(28.7)                 |            |                 | 109(35.2)                     | 107(34.5)                 |            |                 |
| <b>Diameter</b>                     |                               |                           | 0.016      | 0.90            |                               |                           | 0.008      | 0.93            |
| ≤2 cm                               | 216(69.7)                     | 1107(69.3)                |            |                 | 216(69.7)                     | 217(70.0)                 |            |                 |
| >2cm                                | 94(30.3)                      | 490(30.7)                 |            |                 | 94(30.3)                      | 93(30.0)                  |            |                 |
| <b>Histological differentiation</b> |                               |                           | 1.97       | 0.049           |                               |                           | 0.194      | 0.85            |
| Well differentiated                 | 73(23.5)                      | 281(17.6)                 |            |                 | 73(23.5)                      | 73(23.5)                  |            |                 |
| Moderately differentiated           | 209(67.4)                     | 1169(73.2)                |            |                 | 209(67.4)                     | 212(68.4)                 |            |                 |
| Poor differentiated                 | 28(9.0)                       | 147(9.2)                  |            |                 | 28(9.0)                       | 25(8.1)                   |            |                 |
| <b>Lymph node metastasis</b>        |                               |                           | 6.48       | 0.011           |                               |                           | 0.186      | 0.67            |
| N0                                  | 285(91.9)                     | 1385(86.7)                |            |                 | 285(91.9)                     | 282(91.0)                 |            |                 |
| N+                                  | 25(8.1)                       | 212(13.3)                 |            |                 | 25(8.1)                       | 28(9.0)                   |            |                 |
| <b>ER</b>                           |                               |                           | 0.135      | 0.71            |                               |                           | 0.207      | 0.65            |
| Negative                            | 25(8.1)                       | 139(8.7)                  |            |                 | 25(8.1)                       | 22(7.1)                   |            |                 |
| Positive                            | 285(91.9)                     | 1458(91.3)                |            |                 | 285(91.9)                     | 288(92.9)                 |            |                 |
| <b>PR</b>                           |                               |                           | 0.316      | 0.57            |                               |                           | 1.288      | 0.26            |
| Negative                            | 40(12.9)                      | 188(11.8)                 |            |                 | 40(12.9)                      | 31(10.0)                  |            |                 |
| Positive                            | 270(87.1)                     | 1409(88.3)                |            |                 | 270(87.1)                     | 279(90.0)                 |            |                 |
| <b>HER-2</b>                        |                               |                           | 1.25       | 0.26            |                               |                           | 0.444      | 0.51            |
| Negative                            | 259(83.5)                     | 1291(80.8)                |            |                 | 259(83.5)                     | 265(85.5)                 |            |                 |
| Positive                            | 51(16.5)                      | 306(19.2)                 |            |                 | 51(16.5)                      | 45(14.5)                  |            |                 |
| <b>Endocrine therapy</b>            |                               |                           | 15.62      | <0.001          |                               |                           | 0.077      | 0.78            |
| No                                  | 233(75.2)                     | 1014(63.5)                |            |                 | 233(75.3)                     | 230(74.2)                 |            |                 |
| Yes                                 | 77(24.8)                      | 583(36.5)                 |            |                 | 77(24.8)                      | 80(25.8)                  |            |                 |
| <b>Radiotherapy</b>                 |                               |                           | 12.55      | <0.001          |                               |                           | 0.113      | 0.74            |
| No                                  | 305(98.4)                     | 1488(93.2)                |            |                 | 305(98.4)                     | 306(98.7)                 |            |                 |
| Yes                                 | 5(1.6)                        | 109(6.8)                  |            |                 | 5(1.6)                        | 4(1.3)                    |            |                 |

Abbreviation: ER=estrogen receptor; PR=Progesterone receptor; HER-2=human epidermal growth factor receptor-2, PSM= propensity score matching.

**Table S4: Difference in the demographic and clinical factors between the subjects receiving chemotherapy and without in mediate risk population.**

| Factors                             | Before matching               |                           |            |         | After PSM matching            |                           |            |         |
|-------------------------------------|-------------------------------|---------------------------|------------|---------|-------------------------------|---------------------------|------------|---------|
|                                     | Not receiving<br>Chemotherapy | Receiving<br>Chemotherapy | $\chi^2/Z$ | P-value | Not receiving<br>Chemotherapy | Receiving<br>Chemotherapy | $\chi^2/Z$ | P-value |
| <b>Age</b>                          |                               |                           | 19.06      | <0.001  |                               |                           | 0.009      | 0.92    |
| ≤50 years                           | 86(32.3)                      | 702(46.8)                 |            |         | 86(35.2)                      | 85(34.8)                  |            |         |
| >50 years                           | 180(67.7)                     | 799(53.2)                 |            |         | 158(64.8)                     | 159(65.2)                 |            |         |
| <b>Diameter</b>                     |                               |                           | 6.14       | 0.013   |                               |                           | 0.993      | 0.32    |
| ≤2 cm                               | 135(50.8)                     | 639(42.6)                 |            |         | 113(46.3)                     | 124(50.8)                 |            |         |
| >2cm                                | 131(49.2)                     | 862(57.4)                 |            |         | 131(53.7)                     | 120(49.2)                 |            |         |
| <b>Histological differentiation</b> |                               |                           | 0.801      | 0.42    |                               |                           | 0.264      | 0.79    |
| Well differentiated                 | 19(7.1)                       | 64(4.3)                   |            |         | 19(7.8)                       | 8(3.3)                    |            |         |
| Moderately differentiated           | 198(74.4)                     | 1162(77.4)                |            |         | 179(73.4)                     | 197(80.7)                 |            |         |
| Poor differentiated                 | 49(18.4)                      | 275(18.3)                 |            |         | 46(18.8)                      | 39(16.0)                  |            |         |
| <b>Lymph node metastasis</b>        |                               |                           | 24.94      | <0.001  |                               |                           | 0.329      | 0.57    |
| N0                                  | 186(69.9)                     | 802(53.4)                 |            |         | 164(67.2)                     | 158(64.8)                 |            |         |
| N+                                  | 80(30.1)                      | 699(46.6)                 |            |         | 80(32.8)                      | 86(35.2)                  |            |         |
| <b>ER</b>                           |                               |                           | 2.01       | 0.16    |                               |                           | 0.01       | 0.92    |
| Negative                            | 76(28.6)                      | 495(33.0)                 |            |         | 76(31.1)                      | 77(31.6)                  |            |         |
| Positive                            | 190(71.4)                     | 1006(67.0)                |            |         | 168(68.9)                     | 167(68.4)                 |            |         |
| <b>PR</b>                           |                               |                           | 0.658      | 0.42    |                               |                           | 0.076      | 0.78    |
| Negative                            | 99(37.2)                      | 520(34.6)                 |            |         | 98(40.2)                      | 101(41.4)                 |            |         |
| Positive                            | 167(62.8)                     | 981(65.4)                 |            |         | 146(59.8)                     | 143(58.6)                 |            |         |
| <b>HER-2</b>                        |                               |                           | 0.271      | 0.60    |                               |                           | 0.263      | 0.61    |
| Negative                            | 195(73.3)                     | 1123(74.8)                |            |         | 177(72.5)                     | 182(74.6)                 |            |         |
| Positive                            | 71(26.7)                      | 378(25.2)                 |            |         | 67(27.5)                      | 62(25.4)                  |            |         |
| <b>Endocrine therapy</b>            |                               |                           | 8.60       | 0.003   |                               |                           | 0.014      | 0.91    |
| No                                  | 211(79.3)                     | 1059(70.6)                |            |         | 202(82.8)                     | 201(82.4)                 |            |         |
| Yes                                 | 55(20.7)                      | 442(29.4)                 |            |         | 42(17.2)                      | 43(17.6)                  |            |         |
| <b>Radiotherapy</b>                 |                               |                           | 36.43      | <0.001  |                               |                           | 0.069      | 0.79    |
| No                                  | 258(97.0)                     | 1239(82.5)                |            |         | 236(96.7)                     | 237(97.1)                 |            |         |
| Yes                                 | 8(3.0)                        | 262(17.5)                 |            |         | 8(3.3)                        | 7(2.9)                    |            |         |

Abbreviation: ER=estrogen receptor; PR=Progesterone receptor; HER-2=human epidermal growth factor receptor-2, PSM= propensity score matching.

**Table S5: Difference in the demographic and clinical factors between the subjects receiving chemotherapy and in high risk population.**

| Factors                             | Before matching               |                           |            |         | After PSM matching            |                           |            |         |
|-------------------------------------|-------------------------------|---------------------------|------------|---------|-------------------------------|---------------------------|------------|---------|
|                                     | Not receiving<br>Chemotherapy | Receiving<br>Chemotherapy | $\chi^2/Z$ | P-value | Not receiving<br>Chemotherapy | Receiving<br>Chemotherapy | $\chi^2/Z$ | P-value |
| <b>Age</b>                          |                               |                           | 23.66      | <0.001  |                               |                           | 0.125      | 0.72    |
| ≤50 years                           | 41(14.5)                      | 438(28.3)                 |            |         | 41(15.1)                      | 44(16.2)                  |            |         |
| >50 years                           | 242(85.5)                     | 1109(71.7)                |            |         | 231(84.9)                     | 228(83.8)                 |            |         |
| <b>Diameter</b>                     |                               |                           | 7.53       | 0.006   |                               |                           | 0.806      | 0.37    |
| ≤2 cm                               | 67(23.7)                      | 261(16.9)                 |            |         | 62(22.8)                      | 71(26.1)                  |            |         |
| >2cm                                | 216(76.3)                     | 1286(83.1)                |            |         | 210(77.2)                     | 201(73.9)                 |            |         |
| <b>Histological differentiation</b> |                               |                           | 0.115      | 0.91    |                               |                           | 0.117      | 0.91    |
| Well differentiated                 | 5(1.8)                        | 15(1.0)                   |            |         | 4(1.5)                        | 7(2.5)                    |            |         |
| Moderately differentiated           | 203(71.7)                     | 1126(72.8)                |            |         | 197(72.4)                     | 193(71.0)                 |            |         |
| Poor differentiated                 | 75(26.5)                      | 406(26.2)                 |            |         | 71(26.1)                      | 72(26.5)                  |            |         |
| <b>Lymph node metastasis</b>        |                               |                           | 40.96      | <0.001  |                               |                           | 0.034      | 0.85    |
| N0                                  | 96(33.9)                      | 269(17.4)                 |            |         | 88(32.4)                      | 86(31.6)                  |            |         |
| N+                                  | 187(66.1)                     | 1278(82.6)                |            |         | 184(67.6)                     | 186(68.4)                 |            |         |
| <b>ER</b>                           |                               |                           | 0.954      | 0.33    |                               |                           | 0.265      | 0.61    |
| Negative                            | 142(50.2)                     | 825(53.3)                 |            |         | 135(49.6)                     | 141(51.8)                 |            |         |
| Positive                            | 141(49.8)                     | 722(46.7)                 |            |         | 137(50.4)                     | 131(48.2)                 |            |         |
| <b>PR</b>                           |                               |                           | 4.97       | 0.026   |                               |                           | 0.119      | 0.73    |
| Negative                            | 151(53.4)                     | 935(60.4)                 |            |         | 148(54.4)                     | 152(55.9)                 |            |         |
| Positive                            | 132(46.6)                     | 612(39.6)                 |            |         | 124(45.6)                     | 120(44.1)                 |            |         |
| <b>HER-2</b>                        |                               |                           | 0.003      | 0.96    |                               |                           | 0.667      | 0.41    |
| Negative                            | 190(67.1)                     | 1036(67.0)                |            |         | 185(68.0)                     | 176(64.7)                 |            |         |
| Positive                            | 93(32.9)                      | 511(33.0)                 |            |         | 87(32.0)                      | 96(35.3)                  |            |         |
| <b>Endocrine therapy</b>            |                               |                           | 2.688      | 0.10    |                               |                           | 0.136      | 0.71    |
| No                                  | 241(85.2)                     | 1254(81.1)                |            |         | 232(85.3)                     | 235(86.4)                 |            |         |
| Yes                                 | 42(14.8)                      | 293(18.9)                 |            |         | 40(14.7)                      | 37(13.6)                  |            |         |
| <b>Radiotherapy</b>                 |                               |                           | 75.09      | <0.001  |                               |                           | 0.189      | 0.66    |
| No                                  | 273(96.5)                     | 1124(72.7)                |            |         | 262(96.3)                     | 260(95.6)                 |            |         |
| Yes                                 | 10(3.5)                       | 423(27.3)                 |            |         | 10(3.7)                       | 12(4.4)                   |            |         |

Abbreviation: ER=estrogen receptor; PR=Progesterone receptor; HER-2=human epidermal growth factor receptor-2, PSM= propensity score matching.
